# Supplementary material for: State changes of the HORMA protein ASY1 are mediated by an interplay between its closure motif and PCH2
Source: PubMed Central journal article supplement — Nucleic Acids Res. 2020 Jun 19;48(20):11521–35. doi: 10.1093/nar/gkaa527 (PMC7672429; doi:10.1093/nar/gkaa527), 2020-06-19
Supplement: gkaa527_supplemental_file.pdf [file gkaa527_supplemental_file.pdf]

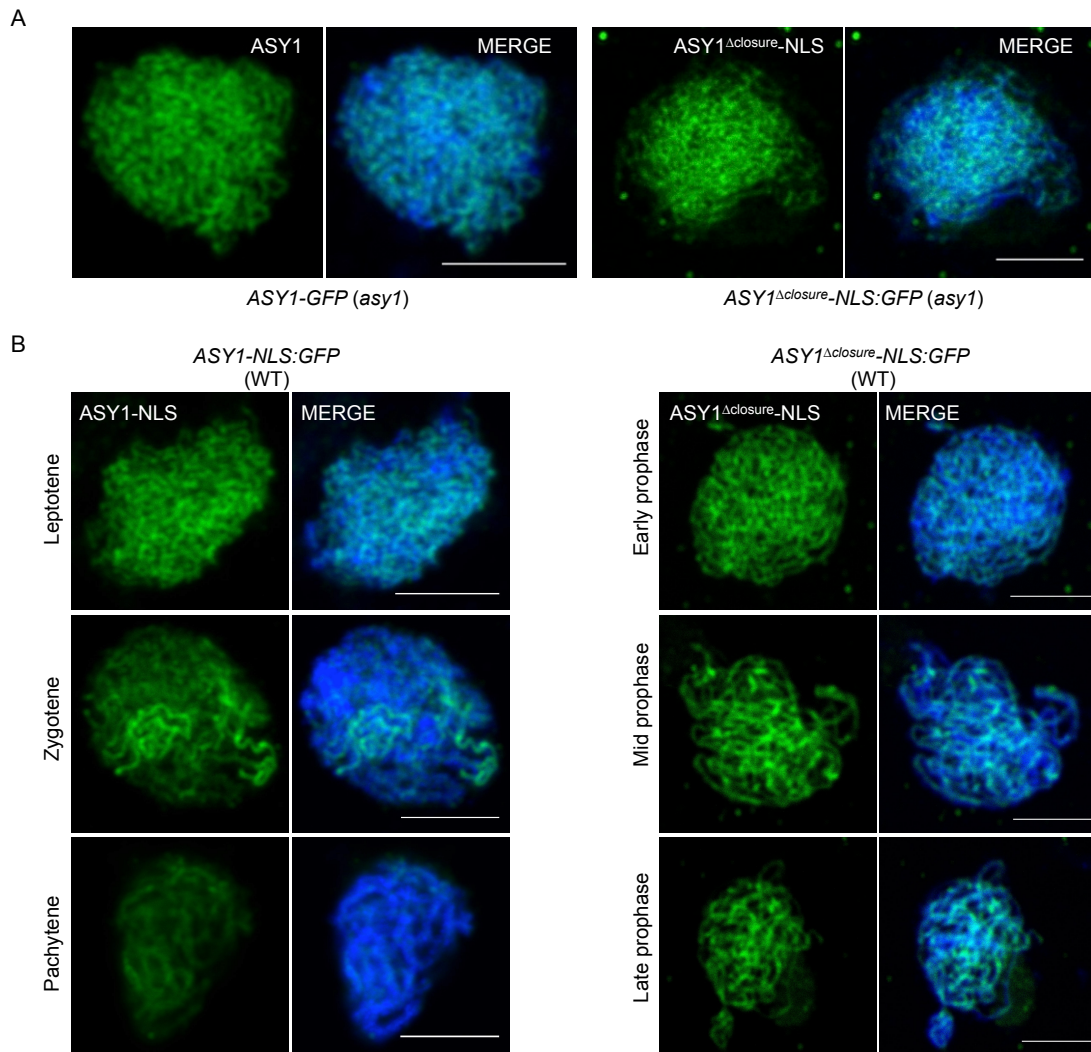

**Supplemental Figure 1. The closure motif of ASY1 is not required for its chromosomal localization.** (A) Immunolocalization of ASY1:GFP and ASY1<sup>Δclosure</sup>-NLS:GFP at early prophase in male meiocytes of *asy1* mutants using antibody against GFP. MERGE shows the overlay of ASY1 signal and DAPI-stained DNA. Bar: 5  $\mu$ m. (B) Immunolocalization of ASY1-NLS:GFP and ASY1<sup>Δclosure</sup>-NLS:GFP at different prophase stages in male meiocytes of wild-type (WT) plants. Bar: 5  $\mu$ m.

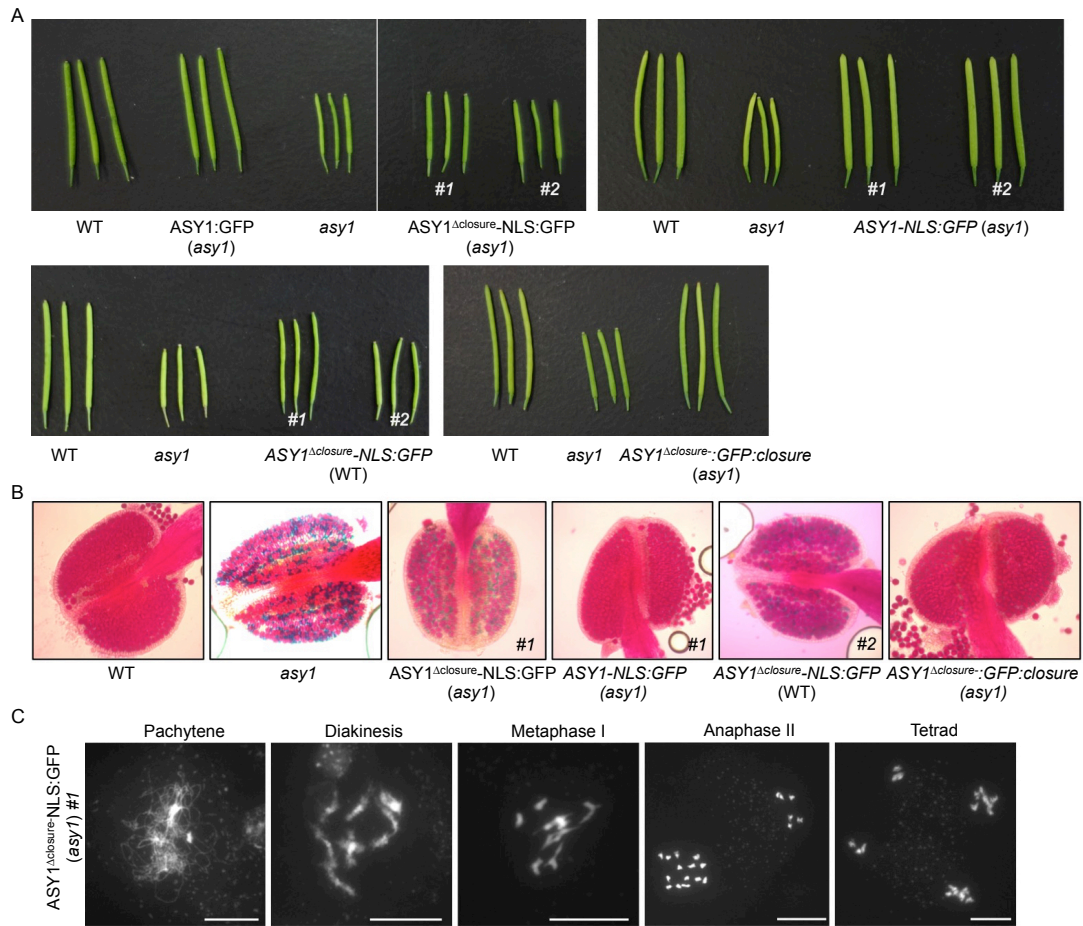

**Supplemental Figure 2. Phenotypic analysis of different *ASY1* alleles.** (A) Siliques of wild-type (WT), *asy1* mutant, *ASY1:GFP(asy1)*, *ASY1 $\Delta$ closure-NLS:GFP(asy1)*, *ASY1-NLS:GFP(asy1)*, *ASY1 $\Delta$ closure-NLS:GFP(WT)*, and *ASY1 $\Delta$ closure::GFP:closure(asy1)* plants. (B) Peterson staining for the pollens from the *ASY1* alleles shown in (A). Blue indicates aborted pollen grains. (C) Chromosome spread analysis of *asy1* mutants harboring *ASY1 $\Delta$ closure-NLS:GFP* at different meiotic stages. Bar: 10  $\mu$ m.

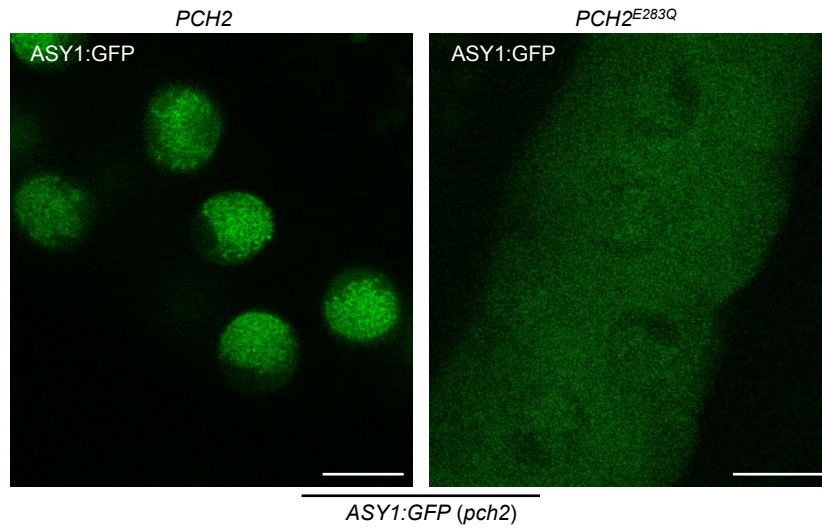

**Supplemental Figure 3. Localization of ASY1:GFP at early prophase in the male meiocytes of *pch2* mutants harboring the wild-type version of *PCH2* or the *PCH2<sup>E283Q</sup>*. Bar: 10  $\mu$ m.**

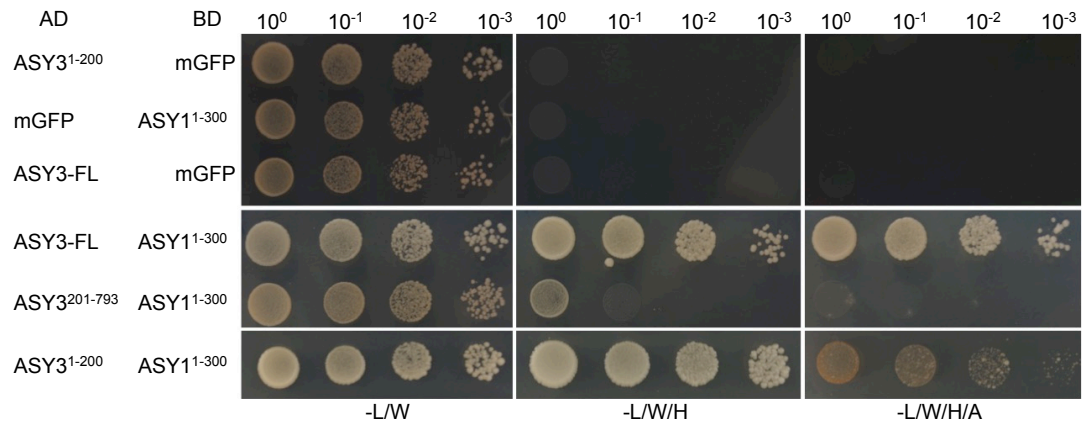

**Supplemental Figure 4. Yeast two-hybrid assay for the interaction of ASY1 HORMA domain with different versions of ASY3.** Yeast cells co-transformed with the relevant AD- and BD-tagged proteins were grown on plates of double (-L/W), triple (-L/W/H) and quadruple (-L/W/H/A) dropout medium with different dilutions for 3 days.

## Supplemental table 1. Primers used in this research.

| Primer name         | Sequence (5' to 3')                                                                                             |
|---------------------|-----------------------------------------------------------------------------------------------------------------|
| gASY1 1-570aa-R     | CTGTGAGGCTTGGCTACAGTTGACTGTC                                                                                    |
| mGFP-F              | CCCGGGGTGGCatggtgagcaaggcgaggagc                                                                                |
| gASY1 1-570aa-R+NLS | CACCTTCTCTTCTTCTTTGGCTGTGAGGCTTGGCTACAGTTGACTGTC                                                                |
| gASY1-promoterATG-R | CATtttgcagaagtgtgaaacgaataacgag                                                                                 |
| gASY1-NLS-571aa-F   | CCAAAGAAGAAGAGAAAAGGTGGACAGACGTGGCAGGAAAACCAGC                                                                  |
| gASY1-R+NLS         | CACCTTCTCTTCTTCTTTGGATTAGCTTGAGATTTCTGACGCTTGG                                                                  |
| gASY1-11aa-F        | GAGATCACTGAGCAGGACTCGCTTCTTCTGg                                                                                 |
| gASY1-intron1-R     | ctggaggtagaacaaaacgaaacgctaaaatcagactg                                                                          |
| ASY1-intron2-F      | gtaagctacgccgatcatcgagcttttgagttttgtttc                                                                         |
| ASY1-TGA-F          | AAATCTCAAGCTAATTGAagacaccacctatcagaccataaccacc                                                                  |
| mGFP-SmaI-R         | CCTGCCACGTCTGTCCCGGGTCCACCTCCctgtacagctcgccatg                                                                  |
| ASY1 571-596aa-F    | GGAGGTGGACCCGGGACAGACGTGGCAGGAAAACCAGCATGGTGAGGGAGCCTATTCTGCAGTACT<br>CCAAGCGTCAGAAATCTCAAGCTAATTGAagacaccacctc |
| ASY1 571-596aa-R    | gagggtgtctTCAATTAGCTTGAGATTTCTGACGCTTGGAGTACTGCAGAATAGGCTCCCTCACCATG<br>CTGGTTTTCTGCCACGTCTGTCCCGGGTCCACCTCC    |
| NLS-SmaI-F          | CCAAAGAAGAAGAGAAAAGGTGCCCGGGGGTGGC                                                                              |
| ASY3-SLICE-F        | AGTCAACTGTAGCCAAGCCTCACAGATGAGCGACTATAGAAGCTTCGGCA                                                              |
| ASY3-SLICE-50aa-R   | CGGGCACCTTCTCTTCTTCTTTGGCAACTTTTCTACTCTAGCAATAAC                                                                |
| ASY3-SLICE-100aa-R  | CGGGCACCTTCTCTTCTTCTTTGGCTCAAGAGTCCCTAATTTCCGATG                                                                |
| ASY1 T184G CDS-F    | GGGCCACCAGATTACGAGCCACCTT                                                                                       |
| ASY1 T184-R         | CACATCATCGTAGTACAGAAGCTTC                                                                                       |
| ASY1-11aa-F         | GAGATCACTGAGCAGGACTCGCTTCTTCTG                                                                                  |
| ATG-attL1-R2        | CATGAAGCCTGCTTTTTTGTACAAAGTTGG                                                                                  |
| ASY1-21aa-F         | ACTAGAAATTTGCTTCGTATTGCTATCTTC                                                                                  |
| ASY3-attB1-F        | GGGGACAAGTTTGTACAAAAAAGCAGGCTTAATGAGCGACTATAGAAGCTTCGGCA                                                        |
| ASY3-200aa-attB2-R  | GGGGACCACTTTGTACAAGAAAGCTGGGTTTACAGTTTTGATCTCAAAACATCAGT                                                        |
| ASY3-201aa-attB1-F  | GGGGACAAGTTTGTACAAAAAAGCAGGCTTCTGGGAGATATTGGGAAAAGCTTCAC                                                        |
| ASY3-attB2-R        | GGGGACCACTTTGTACAAGAAAGCTGGGTTATCATCCCTCAAACATTCTGGGACA                                                         |
